# Supplementary material for: Magneto-electrochemical method for chiral recognition of amino acid enantiomers
Source: Royal Society of Chemistry journal article supplement (doi:10.1039/d4an00547c), 2024-01-01
Supplement: d4an00547c1.pdf [file d4an00547c1.pdf]

## Electronic Supplementary Information

### Magneto-Electrochemical Method for Chiral Recognition of Amino Acid Enantiomers

Yueqian Jia,<sup>‡ac</sup> Wubin Wu,<sup>‡a</sup> Rui Chen,<sup>a</sup> Hong Wang,<sup>ac</sup> Chuang Zhang,<sup>a</sup> Lili Chen,<sup>\*a</sup> and Jiannian Yao<sup>\*ab</sup>

<sup>a</sup> *Key Laboratory of Photochemistry, Beijing National Laboratory for Molecular Sciences, Institute of Chemistry, Chinese Academy of Sciences, Beijing 100190, China.*

<sup>b</sup> *Institute of Molecular Engineering Plus, Fuzhou University, Fuzhou 350108, China.*

<sup>c</sup> *University of Chinese Academy of Sciences, Beijing 100049, China*

E-mail: chenlily@iccas.ac.cn, jnyao@iccas.ac.cn

<sup>‡</sup> These authors contributed equally to this work.

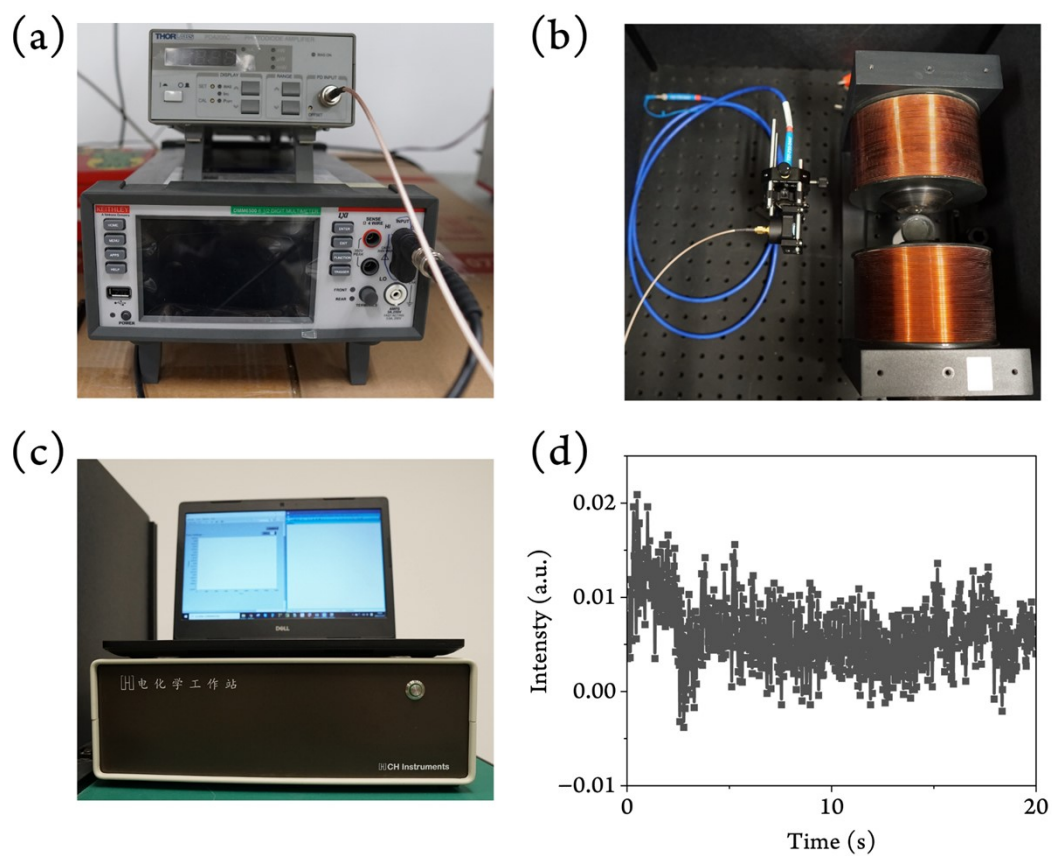

**Fig. S1** (a) Photo of amplifier and digital multimeter (b) Photo of In-situ ECL measurements under magnetic field and silicon detector (c) Photo of electrochemical workstation (d) Background Noise Collected.

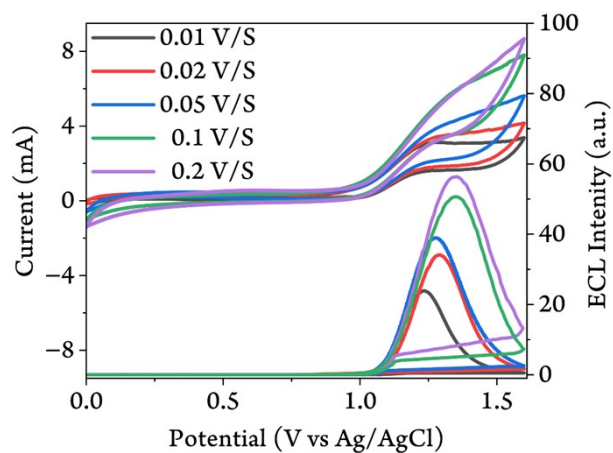

**Fig. S2** Cyclic voltammetric (CV) and electrochromic luminescence versus voltage (ECL-V) curves measured from the electrochemical cell containing 1 mmol/L  $\text{Ru}(\text{bpy})_3^{2+}$ , 100 mmol/L TPrA, and 0.1 mol/L  $\text{NaH}_2\text{PO}_4$ . Scan rate: 0.01, 0.02, 0.05, 0.1, and 0.2 V/s.

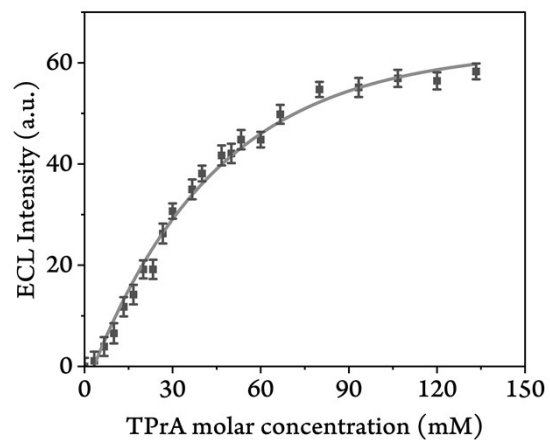

**Fig. S3** ECL intensity is measured from the electrochemical cell containing 1 mmol/L  $\text{Ru}(\text{bpy})_3^{2+}$ , 0.04-130 mmol/L TPrA, and 0.1 mol/L  $\text{NaH}_2\text{PO}_4$ . Scan rate: 200 mV/s.

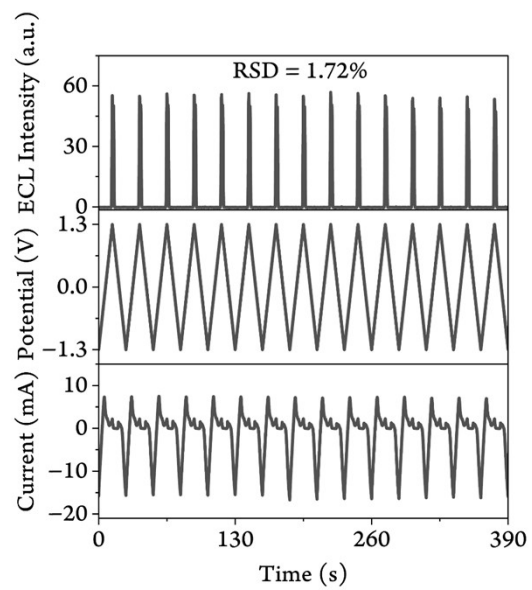

**Fig. S4** ECL, voltage and current versus time curves measured from the electrochemical cell containing 1 mmol/L  $\text{Ru}(\text{bpy})_3^{2+}$ , 100 mmol/L TPrA, and 0.1 mol/L  $\text{NaH}_2\text{PO}_4$ . Scan rate: 0.2 V/s.

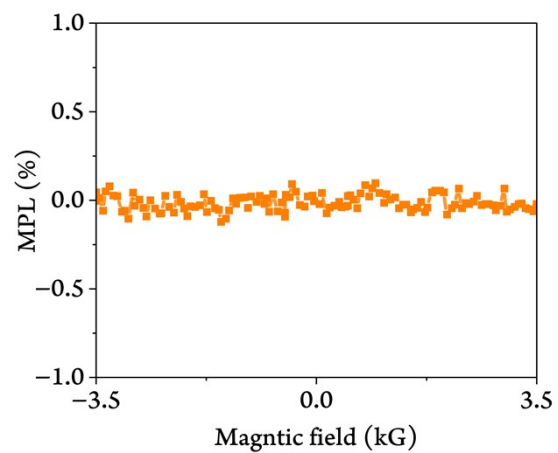

**Fig. S5** MPL response as a function of applied field measured from the 1 mmol/L Ru(bpy)<sub>3</sub><sup>2+</sup> solution (MPL = [PL(B)-PL(0)]/PL(0)×100%,; excitation wavelength: 450 nm).

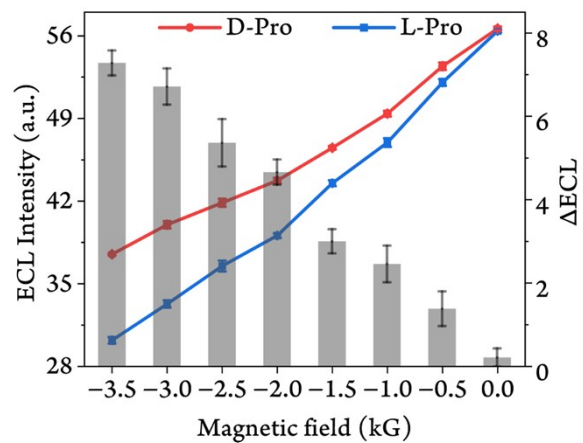

**Fig. S6** ECL intensity (at 1.3 V vs. Ag/AgCl) and ECL difference ( $\Delta$ ECL) measured after reversing the magnetic field direction. The electrolytes contain 1 mM Ru (bpy)<sub>3</sub><sup>2+</sup> and 100 mM TPrA with the addition of 10<sup>-9</sup> M L-Pro (blue line) or 10<sup>-9</sup> M D-Pro (red line).

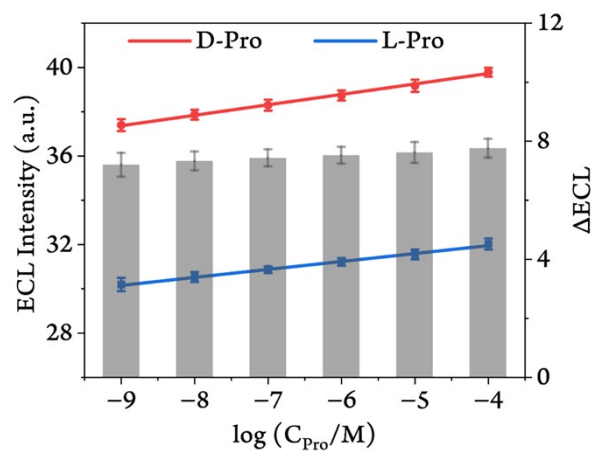

**Fig. S7** ECL intensity as a function of the concentration of L-/D-Pro solutions ( $10^{-9}$  to  $10^{-4}$  mol/L) added into the electrolytes under a field of 3.5 kG. The electrolytes containing 1 mM  $\text{Ru}(\text{bpy})_3^{2+}$ , 100 mM TPrA, and 0.1 M  $\text{NaH}_2\text{PO}_4$ . Scan rate: 200 mV/s. The  $\Delta\text{ECL}$  indicates the ECL difference between adding L- and D-Pro solutions at the same concentration. The fitting curves are  $I_{\text{L-Pro}}(3.5 \text{ kG}) = 33.392 + 0.359 \times \log C_{\text{L-Pro}}$  and  $I_{\text{D-Pro}}(3.5 \text{ kG}) = 41.615 + 0.472 \times \log C_{\text{D-Pro}}$  for L- and D-Pro, respectively.



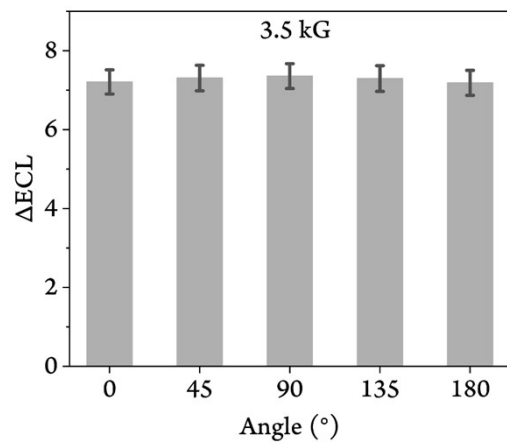

**Fig. S8** The change in ECL intensity under the 3.5 kG magnetic field at different angles. The electrolytes containing 1 mM  $Ru(bpy)_3^{2+}$ , 100 mM TPrA,  $10^{-9}$  M L/D-Pro and 0.1 M  $NaH_2PO_4$ . Scan rate: 200 mV/s.

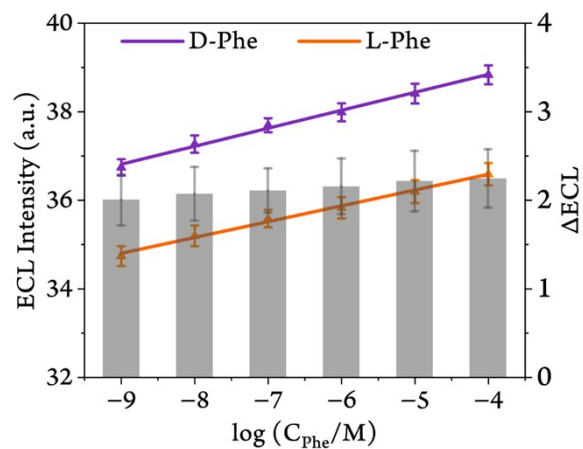

**Fig. S9** ECL intensity as a function of the concentration of L-/D-Phe solutions ( $10^{-9}$  to  $10^{-4}$  mol/L) added in the electrolytes under a field of 3.5 kG field. The electrolytes containing 1 mM  $\text{Ru}(\text{bpy})_3^{2+}$ , 100 mM TPrA, and 0.1 M  $\text{NaH}_2\text{PO}_4$ . Scan rate: 200 mV/s. The  $\Delta\text{ECL}$  indicates the ECL difference between adding L- and D-Phe solutions at the same concentration. The fitting curves are  $I_{\text{L-Phe}}(3.5 \text{ kG}) = 38.107 + 0.357 \times \log C_{\text{L-Phe}}$  and  $I_{\text{D-Phe}}(3.5 \text{ kG}) = 40.466 + 0.406 \times \log C_{\text{D-Phe}}$  for L- and D-Phe, respectively.

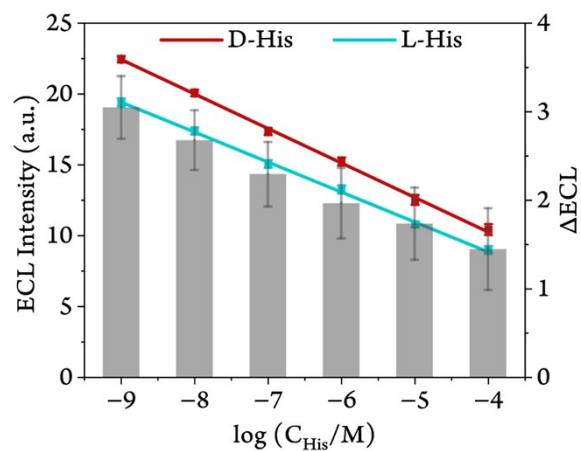

**Fig. S10** ECL intensity as a function of the concentration of L-/D-His solutions ( $10^{-9}$  to  $10^{-4}$  mol/L) added in the electrolytes under a field of 3.5 kG field. The electrolytes containing 1 mM  $\text{Ru}(\text{bpy})_3^{2+}$ , 100 mM TPrA, and 0.1 M  $\text{NaH}_2\text{PO}_4$ . Scan rate: 200 mV/s. The  $\Delta\text{ECL}$  indicates the ECL difference between adding L- and D-His solutions at the same concentration. The fitting curves are  $I_{\text{L-His}}(3.5 \text{ kG}) = 0.387 - 2.115 \times \log C_{\text{L-His}}$  and  $I_{\text{D-His}}(3.5 \text{ kG}) = 0.523 - 2.434 \times \log C_{\text{D-His}}$  for L- and D-His, respectively

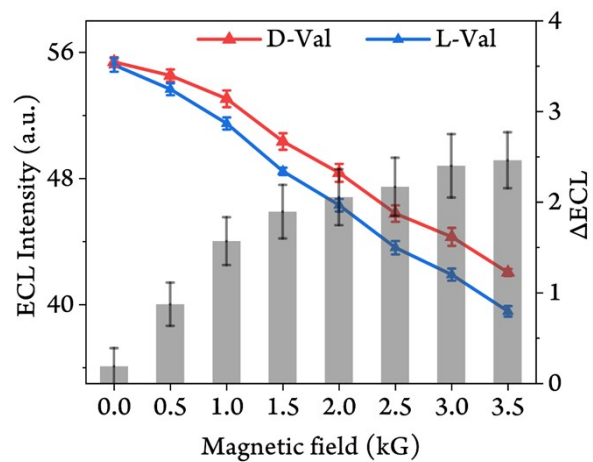

**Fig. S11** ECL intensity (at 1.3 V vs. Ag/AgCl) and  $\Delta$ ECL measured at various magnetic field strengths. The electrolytes contain 1 mM Ru (bpy)<sub>3</sub><sup>2+</sup> and 100 mM TPrA (black line), with the addition of 10<sup>-9</sup> M L-Val (blue line) or 10<sup>-9</sup> M D-Val (red line).

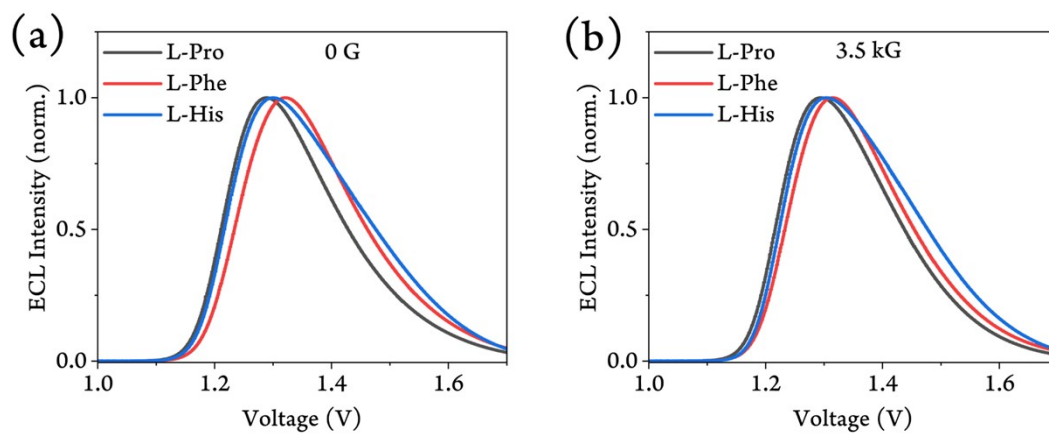

**Fig. S12** (a) Electroluminescence versus voltage (ECL-V) curves measured from the electrochemical cell containing 1 mM  $\text{Ru}(\text{bpy})_3^{2+}$ , 100 mM TPrA, 10-4M amino acids and 0.1 M  $\text{NaH}_2\text{PO}_4$  under 0 G. Scan rate: 20 mV/s. (b) is the same as (a) but under 3.5 kG.

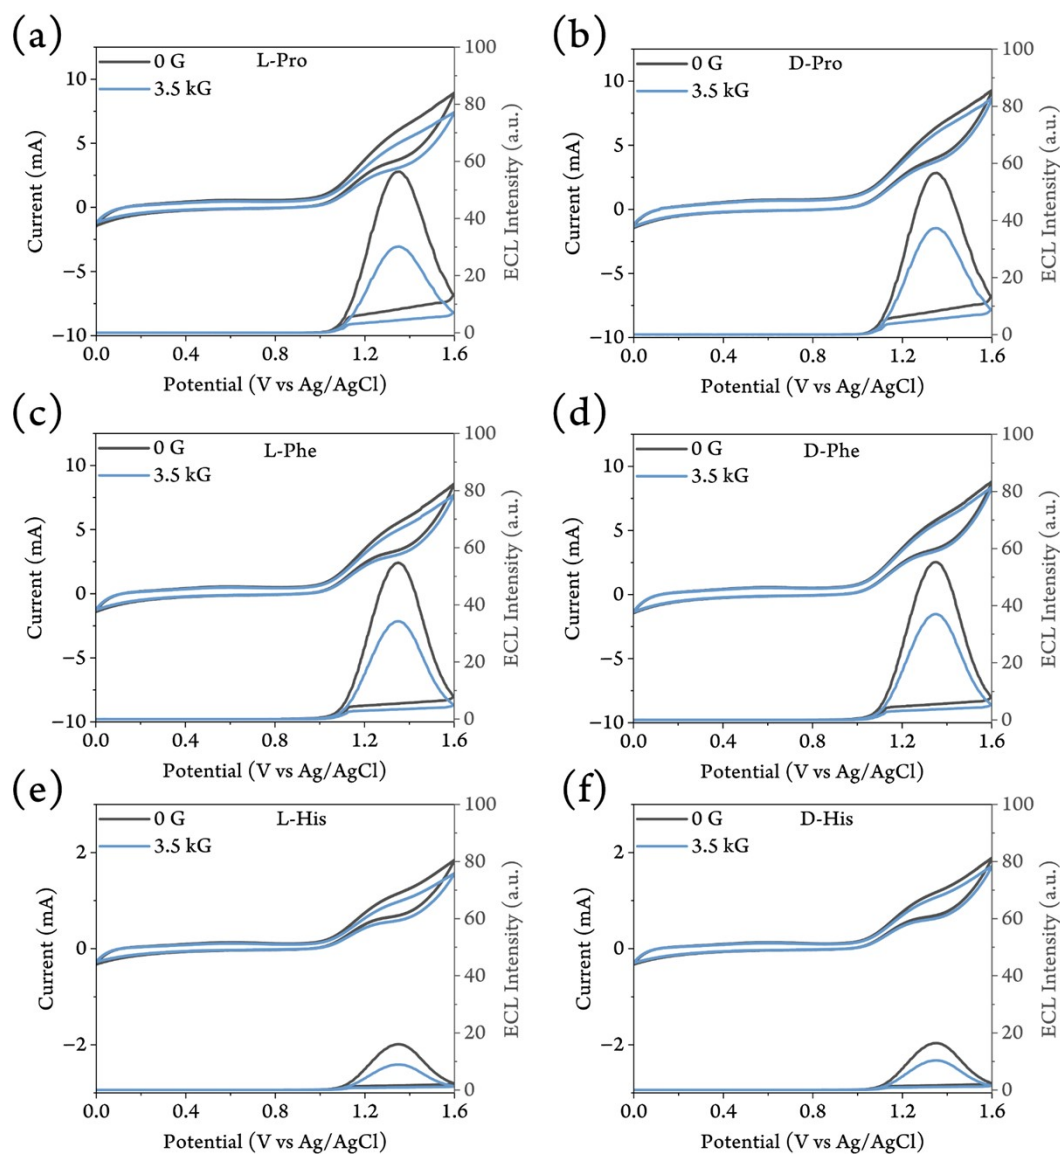

**Fig. S13** (a) Cyclic voltametric (CV) and electrochromic luminescence versus voltage (ECL-V) curves measured from the electrochemical cell containing 1 mM  $\text{Ru}(\text{bpy})_3^{2+}$ , 100 mM TPrA,  $10^{-9}$  M L-Pro and 0.1 M  $\text{NaH}_2\text{PO}_4$  of magnetic field (0, 3.5 kG). Scan rate: 200 mV/s. (b, c, d, e, f) are the same as (a) but for the D-Pro, L-Phe, D-Phe, L-His, D-His solutions.

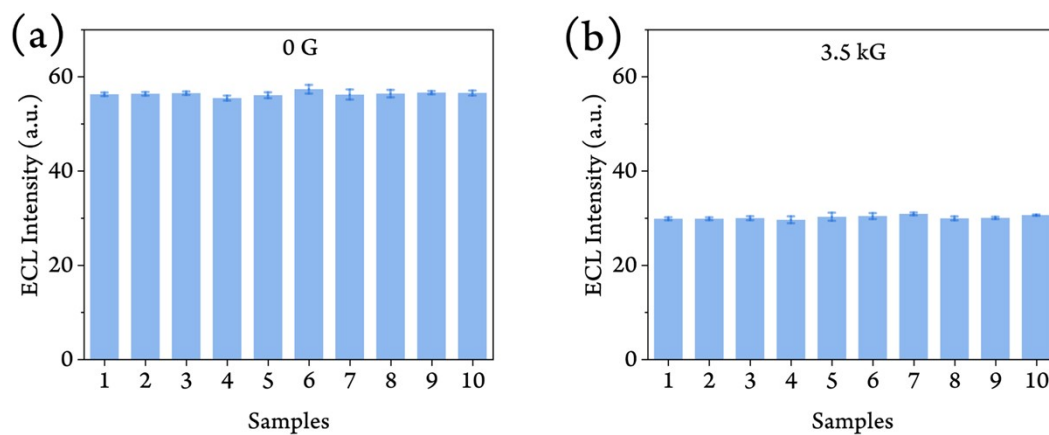

**Fig. S14** (a) Reproducibility of the ECL sensor for  $10^{-9}$  M L-Pro detection under a field of 0 G field. The electrolytes containing 1 mM  $\text{Ru}(\text{bpy})_3^{2+}$ , 100 mM TPrA, and 0.1 M  $\text{NaH}_2\text{PO}_4$ . Scan rate: 200 mV/s. (b) is the same as (a) but for the field of 3.5 kG field.

**Table S1 The ECL Intensity During determination of Amino acids by magneto-electrochemical sensor**

| Counts | added<br>(mol/L)   | ECL Intensity (a.u.) |        |        |        |        |        |
|--------|--------------------|----------------------|--------|--------|--------|--------|--------|
|        |                    | L-Pro                | D-Pro  | L-Phe  | D-Phe  | L-Phe  | D-Phe  |
| 1      | $1 \times 10^{-9}$ | 29.829               | 36.588 | 34.896 | 37.475 | 19.388 | 22.186 |
| 2      |                    | 29.834               | 36.933 | 34.957 | 36.771 | 19.287 | 22.051 |
| 3      |                    | 29.957               | 37.016 | 34.998 | 36.779 | 19.462 | 22.810 |
| 4      |                    | 29.611               | 37.644 | 34.812 | 36.873 | 19.500 | 22.401 |
| 5      |                    | 30.252               | 36.969 | 34.928 | 36.925 | 19.372 | 22.720 |
| 6      |                    | 30.403               | 37.483 | 34.982 | 36.518 | 19.530 | 22.342 |
| 7      |                    | 30.862               | 37.762 | 35.120 | 36.797 | 19.545 | 22.550 |
| 8      |                    | 29.909               | 38.215 | 34.264 | 36.626 | 19.403 | 22.607 |
| 9      |                    | 30.018               | 37.939 | 34.833 | 36.816 | 19.773 | 22.366 |
| 10     |                    | 30.607               | 37.402 | 34.895 | 37.047 | 19.480 | 22.430 |
| 11     |                    | 29.898               | 37.349 | 34.871 | 36.661 | 19.110 | 22.109 |
| 12     |                    | 30.809               | 37.362 | 34.904 | 36.338 | 19.419 | 22.082 |
| 13     |                    | 30.353               | 37.491 | 34.908 | 36.868 | 19.246 | 22.624 |
| 14     |                    | 30.267               | 37.188 | 34.942 | 36.812 | 19.246 | 22.399 |
| 15     |                    | 29.797               | 37.238 | 35.209 | 36.892 | 19.378 | 22.659 |
| 1      | $1 \times 10^{-4}$ | 31.879               | 39.568 | 36.945 | 38.710 | 8.683  | 10.264 |
| 2      |                    | 31.801               | 39.811 | 36.319 | 38.794 | 8.924  | 10.325 |
| 3      |                    | 31.862               | 39.622 | 36.739 | 39.269 | 8.855  | 10.395 |
| 4      |                    | 31.899               | 40.048 | 36.696 | 38.845 | 8.742  | 10.309 |
| 5      |                    | 32.099               | 39.778 | 36.878 | 38.665 | 8.666  | 10.284 |
| 6      |                    | 31.784               | 39.705 | 36.666 | 38.536 | 9.016  | 10.110 |
| 7      |                    | 31.863               | 40.221 | 36.987 | 38.799 | 8.596  | 10.414 |
| 8      |                    | 31.886               | 40.060 | 36.926 | 38.668 | 8.851  | 10.306 |
| 9      |                    | 31.888               | 39.945 | 36.528 | 38.956 | 8.652  | 10.394 |
| 10     |                    | 32.134               | 40.063 | 36.393 | 38.782 | 8.745  | 10.357 |
| 11     |                    | 32.558               | 39.736 | 36.352 | 38.965 | 8.892  | 10.214 |
| 12     |                    | 31.858               | 40.096 | 36.392 | 38.867 | 8.830  | 10.243 |
| 13     |                    | 31.889               | 39.283 | 36.965 | 38.989 | 8.636  | 9.969  |
| 14     |                    | 31.827               | 39.713 | 36.742 | 38.841 | 8.747  | 10.312 |
| 15     |                    | 32.156               | 39.975 | 36.581 | 38.905 | 8.985  | 10.379 |



**Table S2 Results of Determination of Amino acids Enantiomers with magneto-electrochemical sensor**

| sample | added (mol/L)      | measured (mol/L)       | recovery (%) | RSD (% , n=15) |
|--------|--------------------|------------------------|--------------|----------------|
| L-Pro  | $1 \times 10^{-9}$ | $0.996 \times 10^{-9}$ | 99.6         | 1.28           |
|        | $1 \times 10^{-4}$ | $1.019 \times 10^{-4}$ | 101.9        | 1.20           |
| D-Pro  | $1 \times 10^{-9}$ | $1.024 \times 10^{-9}$ | 102.4        | 1.03           |
|        | $1 \times 10^{-4}$ | $1.016 \times 10^{-4}$ | 101.6        | 0.97           |
| L-Phe  | $1 \times 10^{-9}$ | $1.003 \times 10^{-9}$ | 100.3        | 1.10           |
|        | $1 \times 10^{-4}$ | $9.674 \times 10^{-4}$ | 96.74        | 1.05           |
| D-Phe  | $1 \times 10^{-9}$ | $1.007 \times 10^{-9}$ | 100.7        | 1.04           |
|        | $1 \times 10^{-4}$ | $9.947 \times 10^{-4}$ | 99.47        | 0.99           |
| L-His  | $1 \times 10^{-9}$ | $1.014 \times 10^{-9}$ | 101.4        | 1.98           |
|        | $1 \times 10^{-4}$ | $1.066 \times 10^{-4}$ | 106.6        | 4.38           |
| D-His  | $1 \times 10^{-9}$ | $1.006 \times 10^{-9}$ | 100.6        | 1.72           |
|        | $1 \times 10^{-4}$ | $0.976 \times 10^{-4}$ | 97.6         | 3.74           |
